# Supplementary material
Source: Royal Society of Chemistry journal article supplement (doi:10.1039/d6fo00495d)
Supplement: d6fo00495d1.pdf [file d6fo00495d1.pdf]

**Supplementary Table S1.** Characteristics of tomato-based interventions and lycopene exposure in interventional human clinical studies

| Study                                                   | Type supplementation                                          | Quantity <sup>1</sup>     | Lycopene content             | Lycopene intake            | Duration            |
|---------------------------------------------------------|---------------------------------------------------------------|---------------------------|------------------------------|----------------------------|---------------------|
| Pourahmadi Z. et al., 2015                              | Tomato juice (Takdaneh, Iran)                                 | 330                       | 181.8                        | 60                         | 2.9                 |
| Upritchard J.E. et al., 2000                            | Tomato juice (Campbell's, Australia)                          | 500                       | NS                           | NS                         | 4                   |
| <b>Tomato juice (mean ± SD)</b>                         |                                                               | <b>415.0 ± 120.2 mL/d</b> | <b>181.8 mg/L</b>            | <b>60.0 mg LYC/d</b>       | <b>3.5 ± 0.8 w</b>  |
| Chen C-Y. & Chien Y-W., 2024                            | Raw tomato                                                    | 200                       | 55                           | 11                         | 8                   |
| Yang T.H. et al., 2020                                  | Raw beefsteak tomato                                          | 250                       | NS                           | NS                         | 8                   |
| Cuevas-Ramos D. et al., 2013                            | Raw tomato (Roma variety)                                     | 300                       | NS                           | NS                         | 4                   |
| <b>Fresh raw tomato (mean ± SD)</b>                     |                                                               | <b>250.0 ± 50.0 g/d</b>   | <b>55.0 mg/kg</b>            | <b>11.0 mg LYC/d</b>       | <b>6.7 ± 2.3 w</b>  |
| Ried K. et al., 2009                                    | Tomato extract (Lyc-o-Mato®, LycoRed, Israel)                 | 1 capsule                 | 15 mg LYC/capsule            | 15                         | 8                   |
| Thies F. et al., 2012                                   | Tomato extract (Holland and Barret)                           | 1 capsule                 | 10 mg LYC/capsule            | 10                         | 12                  |
| Engelhard Y.N. et al., 2005                             | Tomato extract (Lyc-o-Mato®, LycoRed, Israel)                 | 1 capsule                 | 15 mg LYC/capsule            | 15                         | 8                   |
| Yu Y. et al., 2024                                      | Tomato extract (Fruitflow®, DSM, China)                       | 1 capsule                 | 0 mg LYC/capsule             | 0                          | 6.4                 |
| <b>Tomato extract (mean ± SD)</b>                       |                                                               | <b>1 capsule/d</b>        | <b>10.0 ± 7.1 mg/capsule</b> | <b>10.0 ± 7.1 mg LYC/d</b> | <b>8.6 ± 2.4 w</b>  |
| Thies F. et al., 2012                                   | Tomato products (tomato sauces, soups, juices, ketchup, etc.) | NS                        | NS                           | NS                         | 12                  |
| Park E. et al., 2012                                    | Tomato products (tomato juice and tomato sauce)               | ≥ 1 serving/d             | NS                           | 20.6                       | 13                  |
| <b>Combinaison of tomato-based products (mean ± SD)</b> |                                                               | <b>≥ 1 servings/d</b>     | <b>NS</b>                    | <b>20.6 mg LYC/d</b>       | <b>12.5 ± 0.7 w</b> |
| López-Yerena A. et al., 2023                            | <b>Sofrito (mean ± SD)</b>                                    | <b>100 g/d</b>            | <b>215.6 mg/kg</b>           | <b>21.6 mg LYC/d</b>       | <b>6 w</b>          |

<sup>1</sup> When quantities were not explicitly reported in the original articles, mean intake values were used.

**Supplementary Table S2.** Sensitivity analysis of pooled effect estimates from randomized controlled trials to the assumed pre–post correlation coefficient (*r*).

| Outcome                  | N of studies | P-values |          |          | Interpretation |
|--------------------------|--------------|----------|----------|----------|----------------|
|                          |              | r = 0.25 | r = 0.50 | r = 0.75 |                |
| BW (kg)                  | 7            | 0.32     | 0.31     | 0.29     | Robust (NS)    |
| BMI (kg/m <sup>2</sup> ) | 8            | 0.98     | 0.96     | 0.90     | Robust (NS)    |
| BFM (%)                  | 3            | 0.81     | 0.83     | 0.89     | Robust (NS)    |
| BFM (kg)                 | 3            | 0.37     | 0.37     | 0.37     | Robust (NS)    |
| HC (cm)                  | 3            | 0.64     | 0.64     | 0.63     | Robust (NS)    |
| WC (cm)                  | 5            | 0.04     | 0.04     | 0.04     | Robust (NS)    |
| WHR                      | 4            | 0.70     | 0.63     | 0.48     | Robust (NS)    |
| SBP (mmHg)               | 8            | 0.15     | 0.12     | 0.09     | Robust (NS)    |
| DBP (mmHg)               | 8            | 0.85     | 0.93     | 0.99     | Robust (NS)    |
| TG (mg/dL)               | 7            | 0.95     | 0.97     | 0.79     | Robust (NS)    |
| TC (mg/dL)               | 8            | 0.50     | 0.46     | 0.44     | Robust (NS)    |
| LDL-C (mg/dL)            | 8            | 0.85     | 0.91     | 0.94     | Robust (NS)    |
| HDL-C (mg/dL)            | 7            | 0.15     | 0.14     | 0.16     | Robust (NS)    |
| ApoA-I (mg/dL)           | 3            | 0.83     | 0.79     | 0.73     | Robust (NS)    |
| ApoB-100 (mg/dL)         | 3            | 0.28     | 0.18     | 0.06     | Robust (NS)    |
| FBG (mg/dL)              | 5            | 0.60     | 0.51     | 0.34     | Robust (NS)    |
| Insulin (μU/mL)          | 3            | 0.71     | 0.65     | 0.59     | Robust (NS)    |
| QUICKI                   | 3            | 0.27     | 0.28     | 0.28     | Robust (NS)    |
| CRP (mg/dL)              | 3            | 0.41     | 0.32     | 0.23     | Robust (NS)    |
| IL-6 (pg/L)              | 2            | 0.53     | 0.44     | 0.28     | Robust (NS)    |
| Ox-LDL (mmol/L)          | 2            | 0.96     | 0.95     | 0.93     | Robust (NS)    |
| Creatinine (mg/dL)       | 2            | 0.25     | 0.23     | 0.18     | Robust (NS)    |
| Urea (mg/dL)             | 2            | 0.81     | 0.78     | 0.69     | Robust (NS)    |
| Uric acid (mg/dL)        | 2            | 0.36     | 0.36     | 0.38     | Robust (NS)    |

**ALT**, Alanine aminotransferase; **Apo**, Apolipoprotein; **AST**, Aspartate aminotransferase; **BFM**, Body fat mass; **BMI**, Body mass index; **BW**, Body weight; **CRP**, C reactive protein; **DBP**, Diastolic blood pressure; **FBG**, Fasting blood glucose; **HbA1C**, Glycated hemoglobin, **HC**, Hip circumference; **HOMA-IR**, Homeostatic model assessment for insulin resistance; **HDL-C**, High-density lipoprotein cholesterol; **IL**, Interleukin; **LDL-C**, Low-density lipoprotein cholesterol; **Ox-LDL**, Oxidized low-density lipoprotein; **QUICKI**, Quantitative insulin sensitivity check index; **SBP**, Systolic blood pressure; **TC**, Total cholesterol; **TG**, Triglycerides; **WC**, Waist circumference; **WHR**, Waist-to-hip ratio.

<sup>1</sup> P-values for pooled effect estimates from randomized controlled trials obtained under different assumptions for the pre–post correlation coefficient (*r* = 0.25, 0.50, and 0.75).

<sup>2</sup> Outcomes were considered sensitive to *r* when statistical significance varied across *p*-values of *r* values; otherwise, results were considered robust.

**Supplementary Table S3: Meta-regression analyses of study-level moderators for the meta-analysis.**

| Moderator                      | Outcome <sup>1</sup>     | Number of studies <sup>2</sup> | Effect estimate <sup>3</sup> | P-value <sup>4</sup> |
|--------------------------------|--------------------------|--------------------------------|------------------------------|----------------------|
| <b>Mean baseline of BMI</b>    | BMI (kg/m <sup>2</sup> ) | 8                              | 0.054 [-0.025 ; 0.133]       | 0.17                 |
|                                | BW (kg)                  | 7                              | 0.266 [-0.396 ; 0.927]       | 0.43                 |
|                                | DBP (mmHg)               | 8                              | 0.645 [-0.260 ; 1.551]       | 0.16                 |
|                                | SBP (mmHg)               | 8                              | 0.377 [-1.436 ; 2.190]       | 0.68                 |
|                                | TG (mg/dL)               | 7                              | 5.936 [-0.217 ; 12.089]      | 0.06                 |
|                                | TC (mg/dL)               | 8                              | 1.760 [-1.437 ; 4.956]       | 0.28                 |
|                                | LDL-C (mg/dL)            | 8                              | -0.348 [-2.14 ; 1.444]       | 0.70                 |
|                                | HDL-C (mg/dL)            | 7                              | 0.015 [-1.501 ; 1.531]       | 0.98                 |
| <b>Type of supplementation</b> | BMI (kg/m <sup>2</sup> ) | 8                              | 1.77 (3)                     | 0.62                 |
|                                | BW (kg)                  | 7                              | 0.93 (4)                     | 0.92                 |
|                                | SBP (mmHg)               | 8                              | 9.47 (3)                     | <b>0.02</b>          |
|                                | DBP (mmHg)               | 8                              | 8.62 (3)                     | <b>0.03</b>          |
|                                | TG (mg/dL)               | 7                              | 0.77 (3)                     | 0.85                 |
|                                | TC (mg/dL)               | 8                              | 0.63 (3)                     | 0.89                 |
|                                | LDL-C (mg/dL)            | 8                              | 1.44 (3)                     | 0.69                 |
|                                | HDL-C (mg/dL)            | 7                              | 4.81 (3)                     | 0.18                 |

**BMI**, Body mass index; **BW**, Body weight; **DBP**, Diastolic blood pressure; **HDL-C**, High-density lipoprotein cholesterol; **LDL-C**, Low-density lipoprotein cholesterol; **SBP**, Systolic blood pressure; **TC**, Total cholesterol; **TG**, Triglycerides.

<sup>1</sup> Random-effects models were primarily estimated using restricted maximum likelihood (REML).

<sup>2</sup> Meta-regression analyses were conducted only for outcomes with at least 7 studies available. For some outcomes, certain moderator analyses could not be performed due to insufficient or missing study-level information.

<sup>3</sup> For continuous moderator, effect estimates are reported as regression coefficients with 95% confidence intervals ( $\beta$  [95% CI]). For categorical moderator, results are summarized using the omnibus QM statistic with corresponding degrees of freedom (QM (df)), which quantifies the overall contrast in effect estimates across groups.

<sup>4</sup> For continuous moderators, p-values correspond to Wald tests of the regression coefficient ( $\beta$ ), whereas for categorical moderators p-values are derived from the omnibus test of moderators (QM).

**Supplementary Table S4.** Epidemiological observational studies assessing the relationship between tomato and tomato-based products consumption and anthropometric outcomes and cardiometabolic risk factors.

| Study                                                   | Country       | Cohort                                                     | Participants and subgroup                                                                                                                                                                                                                                                                                                                                                                                                                                                                                                                                                                                 | Exposure assessment                                                                                  | Main results                                                                                                                                                                                                                                                                                                                                                                                                                                                                                                                                                                                                                                                                                                                                         |
|---------------------------------------------------------|---------------|------------------------------------------------------------|-----------------------------------------------------------------------------------------------------------------------------------------------------------------------------------------------------------------------------------------------------------------------------------------------------------------------------------------------------------------------------------------------------------------------------------------------------------------------------------------------------------------------------------------------------------------------------------------------------------|------------------------------------------------------------------------------------------------------|------------------------------------------------------------------------------------------------------------------------------------------------------------------------------------------------------------------------------------------------------------------------------------------------------------------------------------------------------------------------------------------------------------------------------------------------------------------------------------------------------------------------------------------------------------------------------------------------------------------------------------------------------------------------------------------------------------------------------------------------------|
| Sesso et al., 2012 [104]                                | United States | Women's Health Study (WHS) cohort                          | <p><b>27 261 ♀</b></p> <p>Female health professionals, ≥45 years, free of CVD and cancer at baseline, postmenopausal or not intending pregnancy</p> <ul style="list-style-type: none"> <li>• Low consumption tomato (1.5-4servings/w) (average BMI 25.9 kg/m<sup>2</sup>): 14 218 ♀</li> <li>• Moderate consumption tomato (4-7servings/w) (average BMI 26.0 kg/m<sup>2</sup>): 11 377 ♀</li> <li>• High consumption tomato (7-10servings/w) (average BMI 26.1 kg/m<sup>2</sup>): 4 589 ♀</li> <li>• Very high consumption tomato (≥10servings/w) (average BMI 26.1 kg/m<sup>2</sup>): 1 719 ♀</li> </ul> | Tomato consumption assessed using a FFQ                                                              | <p><b>Anthropometry parameters:</b></p> <p>BMI, hypertension, hypercholesterolemia, and diabetes showed a U-shaped distribution across intake categories</p> <p><b>Other parameters:</b></p> <p>↓ TC levels (-0.13 mmol/L between ≥ 10 vs &lt;1.5 servings /week)</p> <p>↓ TC/HDL-C ratio (-0.14 between ≥ 10 vs &lt;1.5 servings /week)</p> <p>↓ HbA1c (-0.11% between ≥ 10 vs &lt;1.5 servings /week)</p> <p><i>NS in TG, LDL-C, HDL-C, fibrinogen, CRP and ICAM-1 levels</i></p> <p>↑ Tomato intake associated with</p> <p>↑ Physical activity, intakes of fruits /vegetables, fiber, vitamin C and lycopene</p> <p>↓ Age, smoking rates</p>                                                                                                      |
| Mazidi et al. 2019 and Mazidi M. et al., 2020 [105,106] | United States | National Health and Nutrition Examination Surveys (NHANES) | <p><b>23,935 adults (11 1680 ♂, 12 255 ♀)</b></p> <p>Mean age 47.6 years, 3 403 deaths during 76.4 months follow-up</p> <ul style="list-style-type: none"> <li>• Low consumption tomato (0.02 cups/d) (average BMI 27.9 kg/m<sup>2</sup>): 7 869 (3 651 ♂, 4 218 ♀)</li> <li>• Moderate consumption tomato (0.03 cups/d) (average BMI 28.4 kg/m<sup>2</sup>): 7 991 (3 668 ♂, 4 323 ♀)</li> <li>• High consumption tomato (1.8 cups/d) (average BMI 28.3 kg/m<sup>2</sup>): 8 075 (4 280 ♂, 3 795 ♀)</li> </ul>                                                                                           | Tomato intake assessed via 24-h dietary recalls using the USDA Automated Multiple-Pass Method (AMPM) | <p><b>Anthropometry parameters:</b></p> <p><i>NS in BMI, WC, abdominal visceral adipose tissue</i></p> <p><b>Other parameters:</b></p> <p><b>Cardio-metabolic parameters (ANCOVA):</b></p> <p>↓ SBP and DBP (SBP: 124.1 → 120.6 mmHg across tomato intake categories)</p> <p>↑ HDL-C (51.6 → 53.6 mg/dL across tomato intake categories)</p> <p>↓ FBG and insulin levels (with higher tomato intake)</p> <p><b>Mortality outcomes (Cox regression):</b></p> <p>↑ Tomato intake associated with</p> <p>↓ Total mortality (RR=0.86, 95% CI 0.81;0.92)</p> <p>↓ CHD mortality (RR=0.76, 95% CI 0.70;0.85)</p> <p>↓ Stroke mortality (RR=0.70, 95% CI 0.62;0.81)</p> <p>↓ Cancer mortality (HR=0.68, 95% CI 0.60;0.79)</p> <p><i>NS in TG levels</i></p> |
| Madlala H.P. et al., 2021 [107]                         | South Africa  | Prospective cohort of pregnant women                       | <p><b>989 ♀</b></p> <p>Pregnant women, median age 29 years, median BMI 29 kg/m<sup>2</sup></p> <ul style="list-style-type: none"> <li>• HIV: 479 ♀</li> <li>• Without HIV: 510 ♀</li> </ul>                                                                                                                                                                                                                                                                                                                                                                                                               | Dietary intake assessed at first visit using a 30-item FFQ                                           | <p><b>Anthropometric parameters:</b></p> <p><b>In women with HIV:</b></p> <p>↑ Tomato consumption (raw/cooked, 4–7 days/week) associated with</p> <p>↓ Overweight/obesity (aOR=0.50, 95% CI 0.30;0.84)</p> <p>↓ Excessive gestational weight gain (aOR=0.48, 95% CI 0.24;0.96)</p>                                                                                                                                                                                                                                                                                                                                                                                                                                                                   |
| Popiolek-                                               | Poland        | Europid                                                    | <b>89 adults (37 ♂, 55 ♀)</b>                                                                                                                                                                                                                                                                                                                                                                                                                                                                                                                                                                             | Flavonols                                                                                            | <b>Anthropometric parameters:</b>                                                                                                                                                                                                                                                                                                                                                                                                                                                                                                                                                                                                                                                                                                                    |

|                                     |  |                           |                                                                                                                                                                                              |                                                                            |                                                                                                                                                                                                                                                                                                                                                                                                                                                                                                                                                                                                                      |
|-------------------------------------|--|---------------------------|----------------------------------------------------------------------------------------------------------------------------------------------------------------------------------------------|----------------------------------------------------------------------------|----------------------------------------------------------------------------------------------------------------------------------------------------------------------------------------------------------------------------------------------------------------------------------------------------------------------------------------------------------------------------------------------------------------------------------------------------------------------------------------------------------------------------------------------------------------------------------------------------------------------|
| <p><b>Kalisz J., 2023 [108]</b></p> |  | <p>adults, ambulatory</p> | <p>Non-smokers, mean age 45.8 years, mean BMI 25.34 kg/m<sup>2</sup></p> <ul style="list-style-type: none"> <li>• With MetS: 32 (17 ♂, 15 ♀)</li> <li>• Without MetS: 57 (sex NS)</li> </ul> | <p>intake assessed using a dedicated <b>FFQ (140 flavonol sources)</b></p> | <p>Participants without MetS ate significantly more tomatoes (0.94 ± 0.76 portions/d) than those with MetS (0.58 ± 0.72 portions/d)</p> <p>↑ Tomato consumption correlated with</p> <p>↓ Number of MetS criteria fulfilled (R=-0.30, 95% CI -0.483; -0.103)</p> <p>↓ MetS advancement in overweight subgroup (R=-0.47, 95% CI -0.712; -0.122)</p> <p><b>Other parameters:</b></p> <p><b><i>In overweight subgroup:</i></b></p> <p>↑ Tomato consumption correlated with</p> <p>↓ TC (R=-0.68, 95% CI -0.897; -0.214)</p> <p>↓ TG (R=-0.64, 95% CI -0.882; -0.144)</p> <p>↓ LDL-C (R=-0.58, 95% CI -0.858; -0.047)</p> |
|-------------------------------------|--|---------------------------|----------------------------------------------------------------------------------------------------------------------------------------------------------------------------------------------|----------------------------------------------------------------------------|----------------------------------------------------------------------------------------------------------------------------------------------------------------------------------------------------------------------------------------------------------------------------------------------------------------------------------------------------------------------------------------------------------------------------------------------------------------------------------------------------------------------------------------------------------------------------------------------------------------------|

**aOR:** Adjusted odds ratio, **BMI:** Body mass index, **CHD:** Coronary heart disease, **CVD:** Cardiovascular disease, **DBP:** Diastolic blood pressure, **FBG:** Fasting blood glucose, **FFQ:** Food frequency questionnaire, **HDL-C:** High-density lipoprotein cholesterol, **HbA1c:** Glycated hemoglobin, **HIV:** Human immunodeficiency virus, **HR:** Hazard ratio, **LDL-C:** Low-density lipoprotein cholesterol, **MetS:** Metabolic syndrome, **RR:** Risk ratio, **SBP:** Systolic blood pressure, **TC:** Total cholesterol, **TG:** Triglycerides.

**Supplementary Table S5.** Preclinical studies investigating the impact of tomato and tomato-derived products on metabolic dysfunction parameters associated with obesity

| Study                         | Animals               | N per group and sex | Control group regimen | Period <sup>2</sup>   | Type of supplementation                                                                                | Dosage                                                              | Main results <sup>3</sup>                                                                                                                                                                                                                                                                                                                                                                                                                                                                                                                                                                                                                                                                         |
|-------------------------------|-----------------------|---------------------|-----------------------|-----------------------|--------------------------------------------------------------------------------------------------------|---------------------------------------------------------------------|---------------------------------------------------------------------------------------------------------------------------------------------------------------------------------------------------------------------------------------------------------------------------------------------------------------------------------------------------------------------------------------------------------------------------------------------------------------------------------------------------------------------------------------------------------------------------------------------------------------------------------------------------------------------------------------------------|
| Brenière T. et al., 2024 [65] | Mice<br>C57BL/6       | 10 ♂                | HFD<br>(45% kcal fat) | 12 w                  | Tomato powder<br>(Freeze-dried process; France)<br><b>from 4 genotypes (H1311, M82, IL6-2, IL12-4)</b> | 5% (w/w)<br>(223.0, 165.5, 93.2 and 104.7µg LYC intake/d) into diet | <p><b>Morphometric parameters:</b></p> <p>↓ BW gain (-30.7% for IL6-2)</p> <p>↓ Relative weight of retroperitoneal and sWAT (-38.6, -44.3g for IL6-2)</p> <p>↓ Adiposity index (-33.0% for IL6-2)</p> <p><i>No significant changes in BW gain and liver and eWAT weight</i></p> <p><b>Other parameters:</b></p> <p>↓ Glucose, insulin plasma, HOMA-IR (-31mg/dL, -0.04ng/mL, -2.3 for IL6-2)</p> <p>↑ Glucose tolerance (glucose AUC after OGTT) (for M82 and IL6-2)</p> <p>↓ Liver lipids fraction (for -27.6, -34.0 and -34.0% for M82, IL6-2 and IL12-4)</p> <p>↓ Inflammation WAT (<i>Lep, Fabp5, Saa3</i> mRNA for all forms)</p> <p><i>No significant changes in TG and NEFA plasma</i></p> |
| Das D. et al., 2024 [114]     | Rats<br>Wistar albino | 6<br>(3 ♂, 3 ♀)     | HFD<br>(65% kcal fat) | 16 w                  | Standardized aqueous extract<br>(Fruitflow®; Provexis, UK)                                             | 150mg/kg BW/d<br>(LYC free) into drinking water                     | <p><b>Morphometric parameters:</b></p> <p>↓ BW (in females)</p> <p><i>NS in water and food intake</i></p> <p><b>Other parameters:</b></p> <p>↓ TG and VLDL-C serum</p> <p>↓ TBARS and ICAM-1 levels and von Willebrand factor (vWF) activity in heart</p> <p><i>NS in TC, HDL-C, LDL-C, ApoA-1, ApoB, LDH, AST, ALT, CR, CK-MB, leptin serum, TNF-α, total ROS levels, SOD and CAT activity in heart</i></p>                                                                                                                                                                                                                                                                                      |
| Di Majo D. et al., 2024 [66]  | Rats<br>Wistar        | 8 ♂                 | HFD<br>(60% kcal fat) | 5 w<br>(after 8w HFD) | Tomato juice of <b>Golden tomato</b><br>(Hot break process and pasteurized)                            | 2mL/kg BW/d<br>(LYC NS) by gavage                                   | <p><b>Morphometric parameters:</b></p> <p>↓ BW (-10%)</p> <p>↑ Food intake</p> <p><b>Other parameters:</b></p> <p>↓ TG, TC and LDL-C plasma</p> <p>↑ HDL-C plasma</p> <p>↑ Glucose tolerance (↓ AUC glucose after OGTT)</p> <p>↓ Leptin plasma</p> <p>↓ Steatosis (-38%)</p> <p>↑ β-oxidation in liver (+47% <i>Ppara</i> mRNA)</p> <p>↓ Oxidative stress in liver (↓ MDA and RONS levels) and plasma (↓ dROMs and LP-CHOLOX levels and ↑ Thiols (SHp) and BAP (antioxidant capacity))</p>                                                                                                                                                                                                        |
| Luis                          | Rats                  | 18 ♂                | HFD                   | 3 m                   | Tomato extract                                                                                         | Equivalent to                                                       | <b>Morphometric parameters:</b>                                                                                                                                                                                                                                                                                                                                                                                                                                                                                                                                                                                                                                                                   |

|                                              |                                 |      |                                                                      |                              |                                                                                                                                           |                                                            |                                                                                                                                                                                                                                                                                                                                                                                                                                                                                                                                                                                                                                     |
|----------------------------------------------|---------------------------------|------|----------------------------------------------------------------------|------------------------------|-------------------------------------------------------------------------------------------------------------------------------------------|------------------------------------------------------------|-------------------------------------------------------------------------------------------------------------------------------------------------------------------------------------------------------------------------------------------------------------------------------------------------------------------------------------------------------------------------------------------------------------------------------------------------------------------------------------------------------------------------------------------------------------------------------------------------------------------------------------|
| Heriberto V.M. et al., 2024 [67]             | Wistar                          |      | (50% kcal fat) + 30% sucrose in drinking water                       | (after 3m HFD)               | of tomato powder (Lipid extract; Saladette tomato variety), mixed with corn oil (60% w/v)                                                 | 5mg LYC/kg BW/d by gavage                                  | <p>↓ Gonadal adipose tissue weight (-2.95g)<br/>         ↑ Testicular weight (+0.51g)<br/> <i>NS in BW, food and water intake and retroperitoneal and visceral WAT</i></p> <p><b>Other parameters:</b><br/>         ↓ TC serum (-10%)<br/>         ↓ Oxidative stress (MDA and NO<sub>2</sub><sup>-</sup> in testicles and spermatozoa)<br/> <i>NS in TG and glucose serum</i></p>                                                                                                                                                                                                                                                  |
| Gambino G. et al., 2023 [68]                 | Rats Wistar                     | 6 ♂  | HFD (60% kcal fat)                                                   | 4 w (after 8w HFD)           | Tomato powder of Golden Tomato (From veraison stage) dissolved in water (1:20)                                                            | 200mg/kg BW/d (3 333.0mg LYC/kg tomato powder) by gavage   | <p><b>Morphometric parameters:</b><br/>         ↓ BW gain (-11.6g)</p> <p><b>Other parameters:</b><br/>         ↑ TC plasma and HDL-C (+38.2 and +26.8mg/dL)<br/>         ↓ LDL-C plasma (-4.1mg/dL)<br/>         ↓ Glucose plasma AUC and 120min after OGTT<br/>         ↓ Hepatic steatosis<br/>         ↓ Oxidative stress in liver (↓MDA and RONS levels and ↑ GSH/GSSG ratio)<br/> <i>NS in TG plasma</i></p>                                                                                                                                                                                                                  |
| Kayode O.T. et al., 2023 [69]                | Drosophila melanogaster Harwich | 50 ♂ | HFD /HSD (kcal fat NS)                                               | 5 d (after 10 d of HFD /HSD) | Tomato powder                                                                                                                             | 20% (w/v) (LYC NS) into diet                               | <p><b>Morphometric parameters:</b><br/>         ↓ BW</p> <p><b>Other parameters:</b><br/>         ↑ HDL-C levels<br/>         ↓ LDL-C levels<br/>         ↓ Oxidative stress (↓ MAD and NO levels and ↑ CAT activity)<br/> <i>NS in TG and TC levels and atherogenic index</i></p>                                                                                                                                                                                                                                                                                                                                                  |
| Pipitone M. et al., 2023 [70]                | Rats Wistar                     | 5 ♂  | HFD (60% kcal fat)                                                   | 4 w (after 8w HFD)           | Tomato powder of Red (R) (High in carotenoids) or Golden tomato (G) (High in polyphenols) (Freeze-dried process) dissolved in water (1:1) | 200mg/kg BW/d (3 330mg and 19 710mg LYC/kg [68]) by gavage | <p><b>Morphometric parameters:</b><br/>         ↓ BW gain at 4 and 5 weeks (R and G)</p> <p><b>Other parameters:</b><br/>         ↓ TG plasma (-40.0 and -26.6mg/dL for R and G)<br/>         ↑ TC plasma (+16.9mg/dL for G)<br/>         ↓ LDL-C plasma (-14.8 and -18.2mg/dL for R and G)<br/>         ↑ HDL-C plasma (+23.1 and +40.4mg/dL for R and G)<br/>         ↓ Glucose plasma (-42.3mg/dL for G) and HOMA-IR (for R and G)<br/>         ↓ Hepatic steatosis (Macrovesicular → Microvesicular, for R and G)<br/>         ↑ Metabolic/Inflammatory genes in liver (<i>Gk, Hnf4a, Lepr, Il6, Tnfa</i> mRNA for R and G)</p> |
| Ferron, A.J.T. et al., 2019 and 2020 [72,73] | Rats Wistar                     | 10 ♂ | HSD (27.8 % kcal fat with 8% sucrose) +25% sucrose in drinking water | 10 w (after 20w HSF)         | Standardized tomato extract (Lyc-O-Mato® 6% dewaxed; Lipid extract; LycoRed Natural Products Industries, Israel)                          | Equivalent to 10mg/kg BW/d of LYC by gavage                | <p><b>Morphometric parameters:</b><br/> <i>NS in BW and adiposity index</i></p> <p><b>Other parameters:</b><br/>         ↓ HOMA-IR<br/>         ↓ Inflammation heart (↓ <i>Tnfa, Il6, Mcp1</i> mRNA)<br/>         Improvement cardiac function (↓ Remodeling; ↑ Systolic/Diastolic function and calcium handling)</p>                                                                                                                                                                                                                                                                                                               |

|                                       |                                                        |        |                                                                    |                      |                                                                                                                                      |                                                                                                                     |                                                                                                                                                                                                                                                                                                                                                                                                                                                                                                                                                                                                                                                                       |
|---------------------------------------|--------------------------------------------------------|--------|--------------------------------------------------------------------|----------------------|--------------------------------------------------------------------------------------------------------------------------------------|---------------------------------------------------------------------------------------------------------------------|-----------------------------------------------------------------------------------------------------------------------------------------------------------------------------------------------------------------------------------------------------------------------------------------------------------------------------------------------------------------------------------------------------------------------------------------------------------------------------------------------------------------------------------------------------------------------------------------------------------------------------------------------------------------------|
|                                       |                                                        |        |                                                                    |                      | <b>mixed with maize oil</b>                                                                                                          |                                                                                                                     | ↓ Oxidative stress markers plasma and heart (CML, AOPP, MDA levels)<br><i>NS in glucose levels and BP</i>                                                                                                                                                                                                                                                                                                                                                                                                                                                                                                                                                             |
| Jesuz V.A. et al., 2019 [119]         | Rats Wistar                                            | 10 ♀   | WD (36% kcal fat estimated)                                        | 60 d                 | Tomato sauce (Local market, Brazil) in aqueous solution with 20% of refined sugar                                                    | Equivalent to 2mg LYC/d (LYC NS) into liquid diet or by gavage                                                      | <b>Morphometric parameters:</b><br>↑ Heart weight (+0.16g)<br><i>NS in BW and liver and heart weight</i><br><b>Other parameters:</b><br>↑ TC serum (+15mg/dL)<br>↓ Glucose serum (-15.5mg/dL)<br>↓ Inflammation serum (IL-1β)<br><i>NS in TG, LDL-C, HDL-C, AST, ALT and TNF-α levels in serum</i>                                                                                                                                                                                                                                                                                                                                                                    |
| Róvero Costa M. et al., 2019 [75]     | Rats Wistar                                            | 6 ♂    | HSF (34% kcal fat with 8% sucrose) + 25% sucrose in drinking water | 10 w (after 20w HFD) | Standardized tomato extract (Lyc-O-Mato® 6% dewaxed; Lipid extract; LycoRed Natural Products Industries, Israel) mixed with corn oil | Equivalent to 10mg LYC/kg BW/d by gavage                                                                            | <b>Morphometric parameters:</b><br><i>NS in BW, BW gain and adiposity index</i><br><b>Other parameters:</b><br>↓ TG plasma (-19.1mg/dL)<br>↑ TC and HDL-C plasma (+14.8 and +9.1mg/dL)<br>↓ Inflammation (TNF-α levels in liver)<br>↓ Microvesicular steatosis<br>↓ Oxidative stress in liver (↓MDA and ↑ CAT, SOD and antioxidant capacity)<br><i>NS in TG, non HDL-C, glucose, AST, ALT, creatinine, urea, uric acid, albumin, total proteins plasma and IL-6 levels in liver</i>                                                                                                                                                                                   |
| Elvira-Torales L.I. et al., 2018 [76] | Rats Sprague-Dawley                                    | 6 ♂    | HFD/HCD (43% kcal fat with 1.25 % cholesterol)                     | 5 w                  | Tomato juice (Juver Alimentación, Spain)                                                                                             | Ad libitum (average intake of 78.8mL/d) (120mg LYC/L tomato juice equiv. to 9.46mg LYC/d) as a substitute for water | <b>Morphometric parameters:</b><br><i>NS in BW, BW gain and liver weight</i><br><b>Other parameters:</b><br>↑ Excreted urine (+18.1mL/day)<br>↑ Cholesterol transport and metabolism gene in liver ( <i>Nr1h4</i> mRNA)<br><i>NS in TG, TC, LDL-C, HDL-C, VLDL-C, glucose, AST, ALT plasma, urinary isoprostanes, MDA and lipid metabolism genes liver</i>                                                                                                                                                                                                                                                                                                            |
| Li C-C. et al., 2018 [77]             | Mice BCO1 <sup>-/-</sup> BCO2 <sup>-/-</sup> double KO | 9 ♂    | HFD (60% kcal fat)                                                 | 24 w                 | Tomato powder (Kagome, Japan)                                                                                                        | 4.19% (w/w) (2 388mg LYC /kg tomato powder, equiv. to 100.1mg LYC/kg diet) into diet                                | <b>Morphometric parameters:</b><br><i>NS in BW, BW gain and liver, visceral WAT weight</i><br><b>Other parameters:</b><br>↓ TG in liver and steatosis score (-1 hepatic steatosis score grade)<br>↑ β-oxidation genes liver ( <i>Cpt1, Acox1, Ppara</i> mRNA, APMK phosphorylation)<br>↓ Lipogenesis (↓ <i>Dgat1</i> mRNA, ↑ ACC phosphorylation, FoxO1 acetylation and <i>Adipor2</i> mRNA) and FA-transport in liver ( <i>Cd36</i> mRNA)<br>↑ Anti-inflammatory WAT and liver ( <i>Adipoq, Il10, Pparg</i> and <i>Nampt</i> mRNA)<br>↓ Pro-inflammatory genes in WAT and liver ( <i>Tnfa, Il1b, Il6</i> mRNA)<br>↑ Richness of intestinal microbiome (OTUs and ACE) |
| Mohri S. et al., 2018                 | Mice C57BL/6                                           | 8-10 ♂ | HFD (60% kcal fat)                                                 | 10 w                 | Tomato extract (From freeze-                                                                                                         | 1% (w/w) (LYC NS)                                                                                                   | <b>Morphometric parameters:</b><br><i>No significant changes in BW, and WAT, BAT, liver and kidney weight</i>                                                                                                                                                                                                                                                                                                                                                                                                                                                                                                                                                         |

|                                       |                        |      |                                                           |      |                                                                               |                                                                                                                                              |                                                                                                                                                                                                                                                                                                                                                                                                                                                                                                                                                                                                                                                                                                                                                                                                                                                                                                                                                  |
|---------------------------------------|------------------------|------|-----------------------------------------------------------|------|-------------------------------------------------------------------------------|----------------------------------------------------------------------------------------------------------------------------------------------|--------------------------------------------------------------------------------------------------------------------------------------------------------------------------------------------------------------------------------------------------------------------------------------------------------------------------------------------------------------------------------------------------------------------------------------------------------------------------------------------------------------------------------------------------------------------------------------------------------------------------------------------------------------------------------------------------------------------------------------------------------------------------------------------------------------------------------------------------------------------------------------------------------------------------------------------------|
| [78]                                  |                        |      |                                                           |      | dried powder;<br>Ethanol extract)                                             | into diet                                                                                                                                    | <p><b>Other parameters:</b></p> <p>↓ TG plasma<br/>↓ Glucose plasma<br/>↓ Inflammation WAT (<i>Nos2</i> mRNA)</p> <p><i>No significant changes in NEFA plasma levels and <i>Mcp1</i> mRNA in WAT</i></p>                                                                                                                                                                                                                                                                                                                                                                                                                                                                                                                                                                                                                                                                                                                                         |
| Fenni S. et al., 2017 [18]            | Mice<br>C57BL/6        | 10 ♂ | HFD<br>(45% kcal fat)                                     | 12 w | Tomato powder<br>(Spray-drying process; Tomato 404, Naturex, France)          | 5% (w/w)<br>(214mg LYC/kg diet)<br>into diet                                                                                                 | <p><b>Morphometric parameters:</b></p> <p>↓ Adiposity index (-34%) and relative weight of eWAT<br/><i>No significant changes in BW, and liver and perirenal WAT weight</i></p> <p><b>Other parameters:</b></p> <p>↓ TG plasma (-9.8ng/dL)</p> <p>↓ Glucose and insulin plasma and HOMA-IR (-21.1mg/dL, -0.08ng/mL and -2)</p> <p>↓ Inflammation liver (↓ <i>Mcp1</i> mRNA) and WAT (↓ <i>Il6, Mcp1, Ccl5, Cxcl10, Mmp3, Mmp9, Hp, Retn</i> mRNA and activation NF-κB; ↑ <i>Il-10, TGFβ</i> mRNA)</p> <p>↓ Oxidative stress plasma (-98pg/mL 8-iso-PGF2α)</p> <p>↓ Lipogenesis liver (<i>Acaca, Fasn, Srebp1</i> mRNA) and in WAT (<i>Acaca, Pparg, Cd36, aP2, Lpl</i> mRNA)</p> <p>↑ β-oxidation genes in liver (<i>Cpt1, Acox, Ppara</i> mRNA)</p> <p>↓ Number of lipid droplet in liver (Hepatic steatosis from grade 2 to 1)</p> <p>↓ Number of adipocyte (Adipocyte hypertrophy)</p> <p><i>No significant changes in TC, NEFA plasma</i></p> |
| García-Alonso F.J., et al., 2017 [82] | Rats<br>Sprague-Dawley | 6 ♂  | HFD/HCD<br>(43% kcal fat with 1.25 % cholesterol)         | 5 w  | Tomato juice<br>(Juver Alimentación, Spain)                                   | Ad libitum drinking<br>(average intake of 29.0mL/d)<br>(101mg LYC/kg tomato juice equiv. to 2.9mg LYC intake/d)<br>as a substitute for water | <p><b>Morphometric parameters:</b></p> <p><i>NS in BW, BW gain and liver weight</i></p> <p><b>Other parameters:</b></p> <p>↑ Lactobacillus species in intestinal microbiota (+11%)</p> <p>↓ Acetate SCFAs in large intestine (-18%)</p> <p>↓ Acetate/Propionate ratio (-17%)</p> <p>↑ Caproate, isobutyrate, valeronate and isovaleronate SCFAs in large intestine</p> <p><i>NS in AST, ALT plasma</i></p>                                                                                                                                                                                                                                                                                                                                                                                                                                                                                                                                       |
| Zidani S. et al., 2017 [86]           | Mice<br>BALB/c         | 10 ♂ | WD/HCD<br>(34% kcal fat estimated with 1.2 % cholesterol) | 12 w | Tomato powder of tomato peel<br>(Freeze-dried process; Local market, Algeria) | 9% (TP1) or 17% (TP2) (w/w)<br>(46.0 and 84.0mg LYC/kg tomato powder, equiv. to ~4.14 and 14.28mg LYC/kg diet and ~0.010 and                 | <p><b>Morphometric parameters:</b></p> <p>↓ Liver weight (-0.6g for TP2)</p> <p>↓ Adipose tissue relative weight (-0.02g for TP1 and 2)<br/><i>NS in BW, BW gain and liver relative weight</i></p> <p><b>Other parameters:</b></p> <p>↓ TG, TC and LDL-C plasma (for TP1 and 2)</p> <p>↑ HDL-C and NEFA plasma (for TP2)</p> <p>↓ Glucose and insulin plasma and HOMA-IR index (for TP1 and 2)</p> <p>↑ Glucose tolerance (glucose AUC after OGTT) (for TP1 and 2)</p> <p>↑ Insulin sensibility (glucose AUC after ITT) (for TP1 and 2)</p> <p>↓ AST (-99.1U/L for TP2), ALT and ALP plasma (for TP1 and 2)</p>                                                                                                                                                                                                                                                                                                                                  |

|                                           |                        |             |                                                                                          |                                                               |                                                                                                                                                          |                                                                                                               |                                                                                                                                                                                                                                                                                                                                                                                                                                                                                                                                                                                                                                                                                                                                                                                  |
|-------------------------------------------|------------------------|-------------|------------------------------------------------------------------------------------------|---------------------------------------------------------------|----------------------------------------------------------------------------------------------------------------------------------------------------------|---------------------------------------------------------------------------------------------------------------|----------------------------------------------------------------------------------------------------------------------------------------------------------------------------------------------------------------------------------------------------------------------------------------------------------------------------------------------------------------------------------------------------------------------------------------------------------------------------------------------------------------------------------------------------------------------------------------------------------------------------------------------------------------------------------------------------------------------------------------------------------------------------------|
|                                           |                        |             |                                                                                          |                                                               |                                                                                                                                                          | 0.036mg LYC intake/d, based on food intake) into diet                                                         | NS in liver steatosis                                                                                                                                                                                                                                                                                                                                                                                                                                                                                                                                                                                                                                                                                                                                                            |
| <b>Aborehab N.M. et al., 2016 [83]</b>    | <b>Rats</b><br>Albino  | <b>6 ♂</b>  | <b>HFD</b><br>(58 % kcal fat)                                                            | <b>12 w</b><br>(8w HFD followed by 4w CD with tomato extract) | <b>Tomato extract</b><br>(Aqueous extract)                                                                                                               | <b>200mg/kg BW/d (T2)</b><br>or <b>400 mg/kg BW/d (T4)</b><br>(LYC NS) into diet                              | <p><b>Morphometric parameters:</b></p> <p>↓ BW gain (-49.9 and -54.4g for T2 and T4)</p> <p>↓ Adiposity index (-1.5 and -1.8 for T2 and T4)</p> <p><b>Other parameters:</b></p> <p>↓ TG, TC and LDL-C serum (-65.5, -61.5 and -53.7mg/dL for T2, and -94.0, -84.7 and -75.0mg/dL for T4)</p> <p>↑ HDL-C serum (+9.2 and +10.0mg/dL for T2 and T4)</p> <p>↓ Glucose serum (-31.0 and -69.7mg/dL for T2 and T4)</p> <p>↓ Insulin serum (-32.0 and -37.4mIU/mL for T2 and T4)</p> <p>↓ HOMA-IR (-14.4 and -16.8 for T2 and T4)</p> <p>↑ R-QUICKI index (+0.06 and +0.10 for T2 and T4)</p> <p>↓ Resistin serum (-7.1 and -9.7ng/mL for T2 and T4)</p> <p>↓ Leptin serum (-102.2 and -124.3pg/mL for T2 and T4)</p> <p>↑ Adiponectin serum (+67.7 and +103.2pg/mL for T2 and T4)</p> |
| <b>Bajerska, J. et al., 2015 [84]</b>     | <b>Rats</b><br>Wistar  | <b>10 ♂</b> | <b>HFD</b><br>(51.5% kcal fat)                                                           | <b>8 w</b>                                                    | <b>Freeze-dried of tomato pomace</b><br>(Agros-Nova, Poland)                                                                                             | <b>2.97% (w/w)</b><br>(2 700mg LYC /kg diet, equiv. to ~48.87mg LYC intake/d, based on food intake) into diet | <p><b>Morphometric parameters:</b></p> <p>↓ Apparent energy digestibility (-4%)</p> <p>↓ Apparent fat digestibility (-4.3%)</p> <p>NS in BW gain, food efficiency and visceral WAT, liver weight</p> <p><b>Other parameters:</b></p> <p>NS in TG, HDL-C, glucose, insulin and homocysteine plasma, HOMA-IR, atherogenic index of plasma, lipid, SAM and SAH liver</p>                                                                                                                                                                                                                                                                                                                                                                                                            |
| <b>Luvizotto R.A.M. et al., 2015 [90]</b> | <b>Rats</b><br>Wistar  | <b>6 ♂</b>  | <b>WD</b><br>(49.7% kcal fat with 24.7% kcal SFA)<br><b>+30% sugar</b> in drinking water | <b>6 w</b><br>(after 6w HFD)                                  | <b>Standardized tomato extract</b><br>(Lyc-O-Mato® 6% dewaxed; Lipid extract; LycoRed Natural Products Industries, Israel)<br><b>mixed with corn oil</b> | <b>Equivalent to 10mg/kg BW/d of LYC</b><br>by gavage                                                         | <p><b>Morphometric parameters:</b></p> <p>NS in BW and adiposity index</p> <p><b>Other parameters:</b></p> <p>↑ Adiponectin plasma (+3.4µg/mL)</p> <p>↓ Inflammation WAT (↑ <i>Adipoq</i>, <i>Sirt1</i>, <i>Foxo1</i> mRNA)</p> <p>↑ FA uptake eWAT (↑ <i>Cd36</i> mRNA)</p> <p>↓ Adipogenesis eWAT (↓ <i>Pparg</i> mRNA)</p>                                                                                                                                                                                                                                                                                                                                                                                                                                                    |
| <b>Smith B.W. et al., 2015 [87]</b>       | <b>Mice</b><br>ApoE-/- | <b>10 ♂</b> | <b>WD</b><br>(45.8% kcal fat with 34% sucrose and 1.5% cholesterol)                      | <b>4 w</b>                                                    | <b>Tomato powder</b><br>(Drum-dried process; FutureCeuticals, USA)                                                                                       | <b>10% (w/w)</b><br>(LYC NS) into diet                                                                        | <p><b>Morphometric parameters:</b></p> <p>NS in BW gain and adipose tissues weight</p> <p><b>Other parameters:</b></p> <p>↑ TC plasma</p> <p>↑ Cholesterol transporter genes in liver (<i>Abcg5</i>, <i>Abcg8</i> mRNA)</p> <p>No significant changes in TG, SAA plasma and lipid liver</p>                                                                                                                                                                                                                                                                                                                                                                                                                                                                                      |

|                                                                   |                                  |      |                                                                |                                  |                                                                                                                                                                      |                                                                                                                                                    |                                                                                                                                                                                                                                                                                                                                                                                                                                                       |
|-------------------------------------------------------------------|----------------------------------|------|----------------------------------------------------------------|----------------------------------|----------------------------------------------------------------------------------------------------------------------------------------------------------------------|----------------------------------------------------------------------------------------------------------------------------------------------------|-------------------------------------------------------------------------------------------------------------------------------------------------------------------------------------------------------------------------------------------------------------------------------------------------------------------------------------------------------------------------------------------------------------------------------------------------------|
| Pierine D.T. et al., 2014 [89]                                    | Rats<br>Wistar                   | 7 ♂  | HFD<br>(50% kcal fat)<br>+ 30% sucrose<br>in drinking<br>water | 6<br>(after 6w<br>HFD)           | Standardized<br>tomato extract<br>(Lyc-O-Mato® 6%<br>dewaxed; Lipid<br>extract; LycoRed<br>Natural Products<br>Industries, Israel)<br><b>mixed with<br/>corn oil</b> | Equivalent to<br>10mg LYC/kg<br>BW for 5d/w<br>by gavage                                                                                           | <b>Morphometric parameters:</b><br>↓ Water intake (-8.4mL/day)<br><i>NS in BW, adiposity index and food intake</i><br><b>Other parameters:</b><br>↓ Inflammation kidney (RAGE and TNF-α levels)<br><i>NS in SBP, GFR, TC, glucose, TNF-α, RAGE plasma, glucose levels post-OGTT<br/>and oxidative stress markers in plasma, kidney and urine</i>                                                                                                      |
| Vilahir G. et al., 2014 [88]                                      | Swine<br>Crossbred<br>commercial | 9 ♀  | WD<br>(49% kcal fat<br>with 20% SFA<br>and 2%<br>cholesterol)  | 10 d                             | Sofrito<br>(Gallina Blanca<br>Star, Spain)                                                                                                                           | 100g/d<br>(215.6mg<br>LYC/kg sofrito<br>equiv. to<br>21.56mg LYC<br>intake/d)                                                                      | <b>Morphometric parameters:</b><br><i>NS in BW and BW gain</i><br><b>Other parameters:</b><br>↑ Endothelial/Vascular function (Coronary vasodilatation induces by<br>acetylcholine and calcium ionophore and eNOS expression and activation)<br>↓ Oxidative stress biomarkers (DNA oxidative damage in endothelial cells [8-<br>OHdG] and lipid peroxidation [TBARS, -12.2nmol MDA])                                                                  |
| Bernal C. et al., 2013 and Martin-Pozuelo G. et al., 2014 [91,92] | Rats<br>Sprague-<br>Dawley       | 5 ♂  | HFD/HCD<br>(43% kcal fat<br>with 1.25%<br>cholesterol)         | 5 w<br>(after 2w<br>HFD<br>/HCD) | Tomato juice<br>(Juver<br>Alimentación,<br>Spain)                                                                                                                    | Ad libitum<br>(average intake<br>of 34.1mL/d)<br>(108mg LYC/kg<br>tomato juice<br>equiv. to 3.2mg<br>LYC intake/d)<br>as a substitute<br>for water | <b>Morphometric parameters:</b><br><i>NS in BW</i><br><b>Other parameters:</b><br>↑ HDL-C plasma (+9.1mg/dL)<br>↓ Oxidative stress (-5.7ng/mg isoprostanes urine)<br>Impairment endothelial function (↑+0.4pg/mL sICAM-1 plasma)<br><i>NS in TG, TC, LDL-C, VLDL-C, glucose, AST, ALT, IL-6, TNF-α, PON, MDA,<br/>sVCAM-1 and ORAC plasma, atherogenic index and MDA levels in liver</i>                                                              |
| Choi K-M. et al., 2013 [93]                                       | Mice<br>C57BL/6                  | 10 ♂ | HFD/HCD<br>(45.4% kcal<br>fat with 0.5%<br>cholesterol)        | 13 w<br>(after 4w<br>HFD)        | Tomato extract<br>of <b>Red (R)</b> (High<br>carotenoids) or<br><b>Green tomato<br/>(G)</b> (High<br>glycoalkaloids)<br>(Aqueous<br>extract)                         | 2% (w/w)<br>(LYC NS)<br>into diet                                                                                                                  | <b>Morphometric parameters:</b><br>↓ BW, BW gain and eWAT weight (-4.2g, -22.5% and -27.5% for G)<br><i>NS in brain, kidney, lung and liver weight</i><br><b>Other parameters:</b><br>↓ TC in liver (-114.3mg/dL for GTE)<br>↓ Lipogenesis in liver (↑ p-AMPK, p-ACC and ↓ <i>Hmgcr</i> mRNA for G)<br>↓ Adipogenesis in WAT (↓ <i>Pparg</i> , <i>Cebpa</i> and <i>Plin</i> mRNA for R and G)<br><i>NS in lipid profile serum, TG levels in liver</i> |
| Choi S-K. and Seo J-S., 2013 [94]                                 | Gerbils<br>Mongolian             | 10 ♂ | HFD<br>(45% kcal fat)                                          | 6 w                              | Standardized<br>tomato extract<br>(Lyc-O-Mato<br>Beads®; Lipid<br>extract; LycoRed<br>Natural Products<br>Industries, Israel)                                        | 0.5 g/kg diet /d<br>(50mg LYC/kg<br>bead, equiv. to<br>25mg LYC/kg<br>diet)<br>into diet                                                           | <b>Morphometric parameters:</b><br>↓ Mesenteric WAT weight (-0.5g)<br><i>NS in eWAT weight</i><br><b>Other parameters:</b><br>↓ Oxidative stress in liver, erythrocytes and plasma (↓ -5.5, -2.1nmol/mg<br>lipid peroxide liver and erythrocyte; ↑ +0.1nmol/mL total antioxidant status<br>(TAS) plasma and +0.05U/min/mg protein GST activity in liver)<br><i>NS in other oxidative stress markers in liver and erythrocyte</i>                      |

|                                        |                        |            |                                                                       |                    |                                                                                                                                       |                                                                                                                                 |                                                                                                                                                                                                                                                                                                                                                                                                                                                                                                        |
|----------------------------------------|------------------------|------------|-----------------------------------------------------------------------|--------------------|---------------------------------------------------------------------------------------------------------------------------------------|---------------------------------------------------------------------------------------------------------------------------------|--------------------------------------------------------------------------------------------------------------------------------------------------------------------------------------------------------------------------------------------------------------------------------------------------------------------------------------------------------------------------------------------------------------------------------------------------------------------------------------------------------|
| Luvizotto R.A.M. et al., 2013 [95]     | Rats Wistar            | 6 ♂        | WD (49.7% kcal fat with 24.7% kcal SFA) + 30% sugar in drinking water | 6 w (after 6w HFD) | Standardized tomato extract (Lyc-O-Mato® 6% dewaxed; Lipid extract; LycoRed Natural Products Industries, Israel) mixed with maize oil | 2mL/kg BW/d (equiv. to 10mg LYC/kg BW/d) by gavage                                                                              | <p><b>Morphometric parameters:</b><br/>NS in BW and heart weight</p> <p><b>Other parameters:</b><br/>↓ Inflammation in plasma (-3.1 and -2.6ng/mL for leptin and resistin and -18pg/mL for IL-6) and in eWAT (<i>Lep, Retn, Il6</i> and <i>Mcp1</i> mRNA)<br/>NS in glucose, insulin, TNF-<math>\alpha</math> plasma, <i>Tnfa</i> mRNA in eWAT</p>                                                                                                                                                     |
| Shao D. et al., 2013 [97]              | Hamsters Golden Syrian | 8-10 ♂     | HFD/HCD (60% kcal fat with 1% cholesterol)                            | 3 w                | Tomato powder of tomato pomace (Hot-break and hot air drying processes)                                                               | 41.7% (w/w) (100.2mg LYC/kg tomato powder, equiv to 41.8mg LYC/kg diet and ~0.9mg LYC intake/d, based on food intake) into diet | <p><b>Morphometric parameters:</b><br/>↑ BW gain (+8.1g)<br/>↑ Food efficiency (BW gain/food intake) (+0.04)<br/>NS in food intake and liver, retroperitoneal and eWAT weight</p> <p><b>Other parameters:</b><br/>↓ HDL-C plasma (-14%)<br/>↓ Total lipids (-18%), TC and free cholesterol in liver (-21 and -16%)<br/>↑ Total lipids, TG, TC and free cholesterol feces (+370, +932, +46 and +77%)<br/>↑ Fecal bile acid excretion (+471%)<br/>No NS in TG, TC, LDL-C, VLDL-C plasma and TG liver</p> |
| Hsu Y.M. et al., 2008 [99]             | Hamsters Golden Syrian | 8 (sex NS) | HFD (NS kcal fat with 0.2 % cholesterol)                              | 8 w                | Tomato powder of tomato paste (Freeze-dried process)                                                                                  | 3% and 9% (w/w) (1 087.5mg LYC/kg tomato powder, equiv. to 32.6 and 97.9mg LYC/kg diet) into diet                               | <p><b>Morphometric parameters:</b><br/>NS in BW</p> <p><b>Other parameters:</b><br/>↓ TC and LDL-C serum (-35.5 and -9.3mg/dL for 9% dose)<br/>↑ HDL-C serum (+14.6 and +21.6mg/dL for 3 and 9% doses)<br/>↓ Oxidative stress in serum (↑ +190.1min lag time LDL oxidation, CAT and GSH-Px activities [for 9% dose] and ↓ TBARS [for 3 and 9% doses])<br/>NS in TG and HDL-C serum, SOD activity</p>                                                                                                   |
| Suganuma H. and Inakuma T., 1999 [100] | Mice ICR               | 10 ♂       | HFD/HCD (41% kcal fat estimated with 1.5% cholesterol)                | 4 m                | Tomato powder of concentrated tomato juice (Freeze-dried process)                                                                     | 20 % (w/w) (1 600mg LYC/kg tomato powder, equiv. to 320mg LYC/kg diet) into diet                                                | <p><b>Morphometric parameters:</b><br/>NS in BW</p> <p><b>Other parameters:</b><br/>↓ Oxidative stress (TBARS plasma)<br/>Improvement endothelial function (↑ Acetylcholine-induced relaxation)<br/>NS in TC serum and aortic norepinephrine-induced vaso-contraction</p>                                                                                                                                                                                                                              |

4-HNE: 4-hydroxynonenal, 8-OHdG: 8-hydroxy-2'-deoxyguanosine, Abcg5: ATP-binding cassette subfamily G member 5, Abcg8: ATP-binding cassette subfamily G member 8, ACC:

Acetyl-CoA carboxylase, Acaca: Acetyl-CoA carboxylase alpha, Adipoq: Adiponectin, AOM: Azoxymethane, AOPP: Advanced oxidation protein products, ALT: Alanine

aminotransferase, ALP: Alkaline phosphatase, AST: Aspartate aminotransferase, AUC: Area under the curve, BAT: Brown adipose tissue, BAP: Biological antioxidant potential, BP:

Blood pressure, **BW**: Body weight, **CAT**: Catalase, **CD**: Chow diet, **CK-MB**: Creatine kinase–myocardial band, **CML**: Carboxymethyl-lysine, **CR**: Creatinine, **Cpt1**: Carnitine palmitoyltransferase-1, **DBP**: Diastolic blood pressure, **Dgat**: Diacylglycerol O-acyltransferase, **dROMs**: Reactive oxygen metabolites, **eWAT**: Epididymal white adipose tissue, **FA**: Fatty acids, **Fasn**: Fatty acid synthase, **FGF21**: Fibroblast growth factor 21, **Gk**: Glycerol kinase, **GSH**: Reduced glutathione, **GSH-Px**: Glutathione peroxidase, **GSSG**: Oxidized glutathione, **GST**: Glutathione S-transferase, **HCD**: High-cholesterol diet, **HFD**: High-fat diet, **HDL-C**: High-density lipoprotein cholesterol, **Hnf4a**: Hepatocyte nuclear factor 4 alpha, **HOMA-IR**: Homeostasis model assessment–insulin resistance, **HSF**: High-sucrose/fat diet, **HSD**: High-sugar diet, **ICAM-1**: Intercellular adhesion molecule-1, **IL**: Interleukin, **ITT**: Insulin tolerance test, **LDH**: Lactate dehydrogenase, **LDL-C**: Low-density lipoprotein cholesterol, **Lep**: Leptin, **LP-CHOLOX**: Lipoperoxides (lipid hydroperoxides/oxidized cholesterol products), **Lpl**: Lipoprotein lipase, **LYC**: Lycopene, **Mcp1**: Monocyte chemoattractant protein-1, **MDA**: Malondialdehyde, **Nampt**: Nicotinamide phosphoribosyltransferase, **NEFA**: Non-esterified fatty acids, **NF- $\kappa$ B**: Nuclear factor kappa B, **NO**: Nitric oxide, **NOx**: Nitrite/nitrate metabolites, **NOS2**: Inducible nitric oxide synthase, **NS**: Not significant, **OGTT**: Oral glucose tolerance test, **ONOO<sup>-</sup>**: Peroxynitrite, **ORAC**: Oxygen radical absorbance capacity, **OTUs**: Operational taxonomic units, **Pklr**: Pyruvate kinase, liver and red blood cell isoform, **PPAR**: Peroxisome proliferator-activated receptor gamma, **Ppargc**: PPAR gamma coactivator, **R-QUICKI**: Revised quantitative insulin sensitivity check index, **Retn**: Resistin, **RONS**: Reactive oxygen and nitrogen species, **ROS**: Reactive oxygen species, **SAA**: Serum amyloid A, **SAH**: S-adenosylhomocysteine, **SAM**: S-adenosylmethionine, **SBP**: Systolic blood pressure, **SCFAs**: Short-chain fatty acids, **sICAM-1**: Soluble intercellular adhesion molecule-1, **SOD**: Superoxide dismutase, **SREBP-1c**: Sterol regulatory element-binding protein-1c, **Srebf1**: Sterol regulatory element-binding transcription factor 1, **TAS**: Total antioxidant status, **TBARS**: Thiobarbituric acid reactive substances, **TC**: Total cholesterol, **TG**: Triglycerides, **TNF- $\alpha$** : Tumor necrosis factor alpha, **VCAM-1**: Vascular cell adhesion molecule-1, **VLDL-C**: Very-low-density lipoprotein cholesterol, **vWAT**: Visceral white adipose tissue, **WAT**: White adipose tissue, **WD**: Western diet, **sWAT**: Subcutaneous white adipose tissue

<sup>1</sup> Studies derived from the same cohort but reporting different outcomes were consolidated, and both publication years are indicated.

<sup>2</sup> Duration is expressed as follows: **d**, days; **w**, weeks; **m**, months.

<sup>3</sup> The results presented reflect values that differ significantly from those of the control group; the differential values represent the magnitude of change between the intervention treatment and the control diet.

**Supplementary Figure S1.** Risk of bias assessment of clinical trials in the meta-analysis (Rob2).

|                                | <u>D1</u> | <u>DS</u> | <u>D2</u> | <u>D3</u> | <u>D4</u> | <u>D5</u> | <u>Overall</u> |
|--------------------------------|-----------|-----------|-----------|-----------|-----------|-----------|----------------|
| <b>Cross-over studies</b>      |           |           |           |           |           |           |                |
| López-Yerena A. et al., 2023   | +         | +         | +         | +         | +         | +         | +              |
| <b>Parallel studies</b>        |           |           |           |           |           |           |                |
| Chen C-Y. and Chien Y-M., 2024 | -         |           | -         | +         | +         | !         | -              |
| Yu Y. et al., 2024             | +         |           | !         | +         | +         | +         | !              |
| Yang T.H. et al., 2020         | -         |           | -         | +         | +         | !         | -              |
| Pourahmadi et al., 2015        | +         |           | +         | +         | +         | +         | +              |
| Cuevas-Ramos D. et al., 2013   | +         |           | +         | +         | +         | !         | !              |
| Park E. et al., 2012           | +         |           | +         | +         | +         | +         | +              |
| Thies F. et al., 2012          | !         |           | -         | +         | +         | !         | -              |
| Ried K. et al., 2009           | +         |           | +         | +         | +         | +         | +              |
| Upritchard J.E. et al., 2000   | +         |           | +         | +         | +         | +         | +              |
| Engelhard Y.N. et al., 2005    | -         |           | !         | !         | +         | +         | -              |

**Domains**

- D1 : Bias arising from the randomization process
- DS : Bias arising from period and carryover effects
- D2 : Bias due to deviations from the intended intervention
- D3 : Bias due to missing outcome data
- D4 : Bias in measurement of the outcome
- D5 : Bias in selection of the reported result

**Judgment**

- Low risk
- Some concerns
- High risk

## Supplementary Figure S2. Funnel plots assessing potential publication bias in meta-analysis.

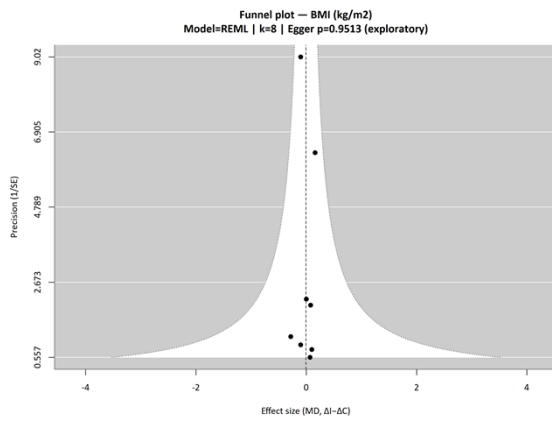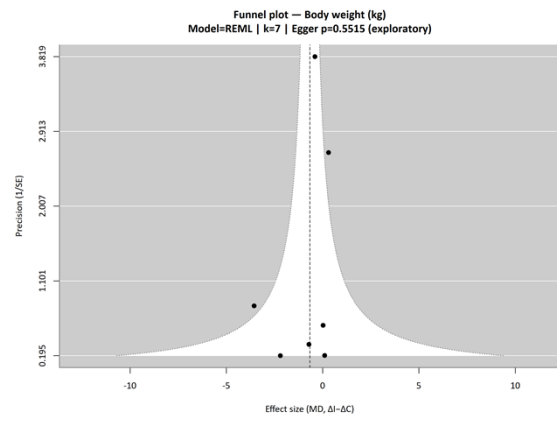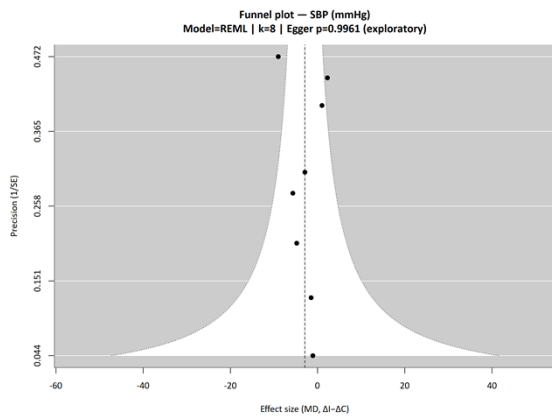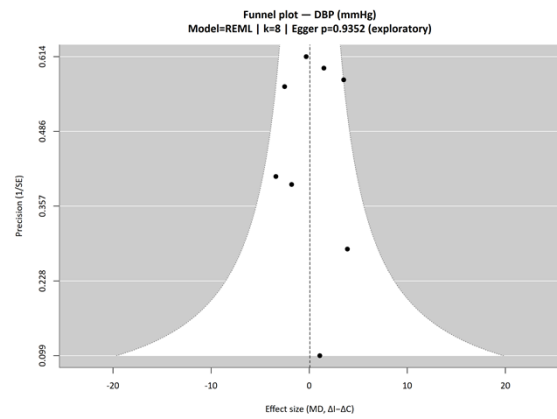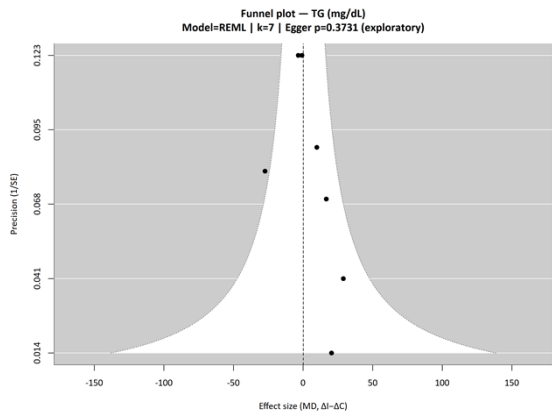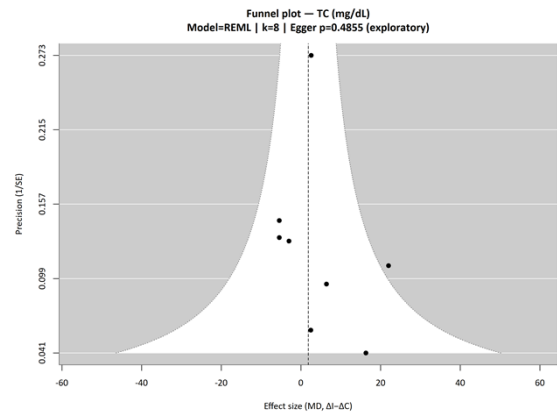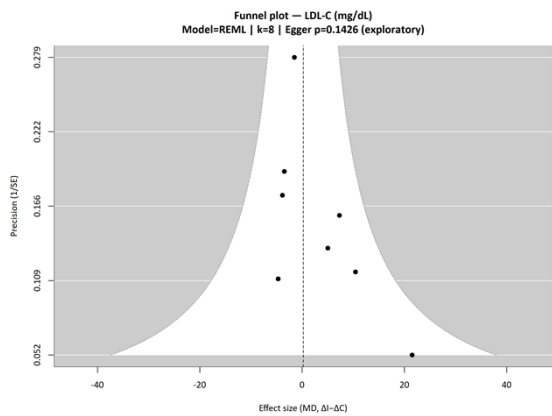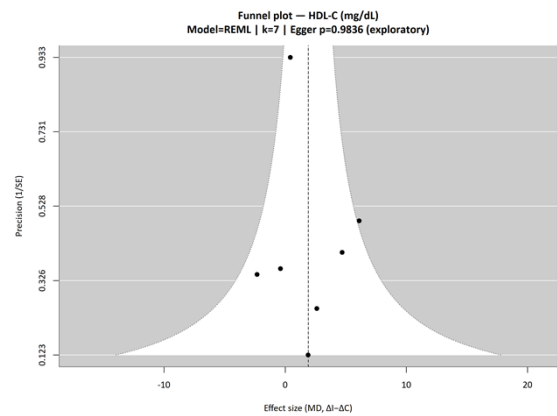

**Supplementary Figure S3.** Meta-regression bubble plots of the association between supplement type and changes in systolic (A) and diastolic (B) blood pressure in the meta-analysis.

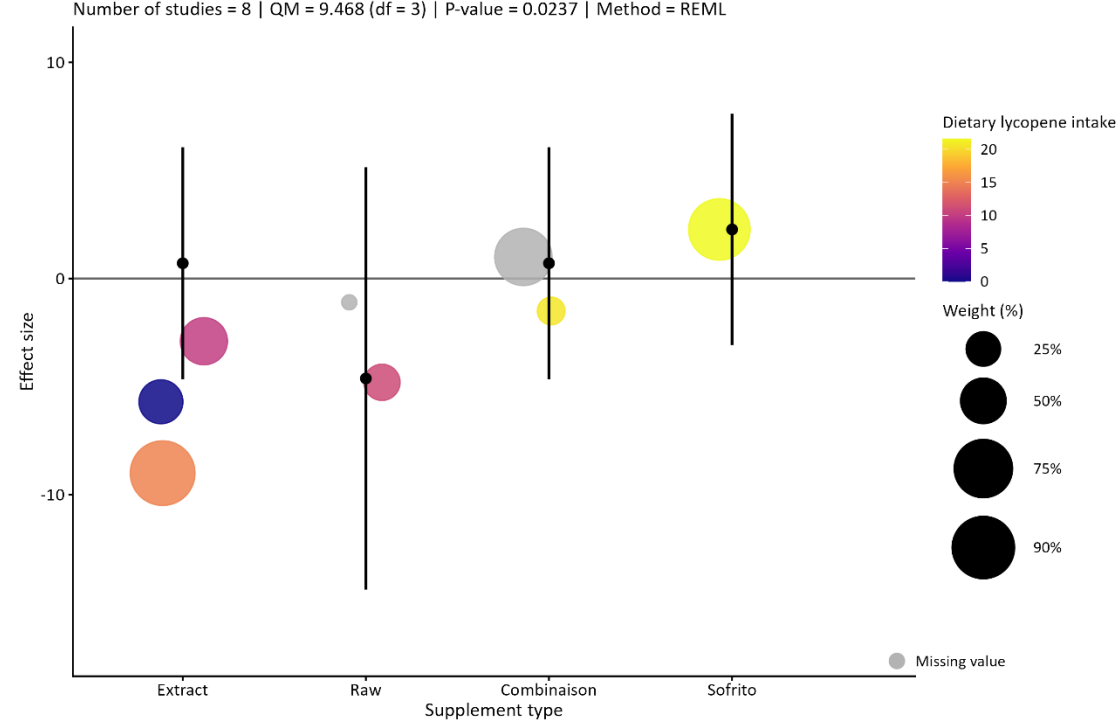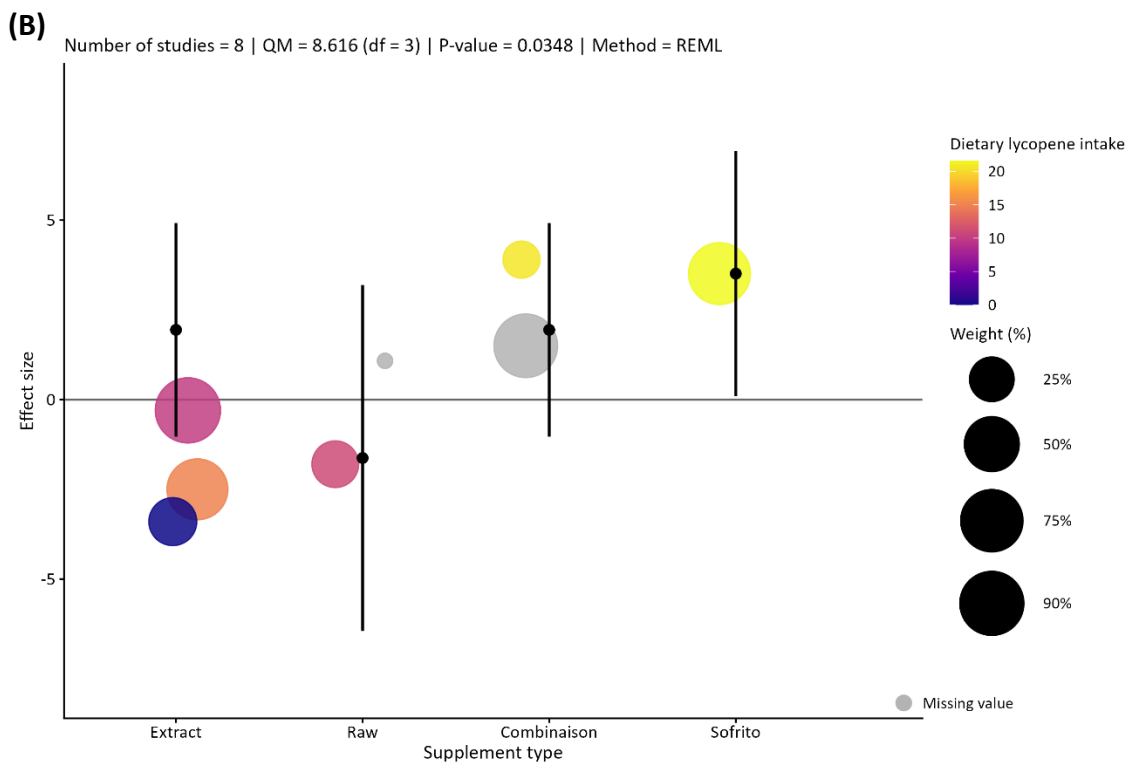

Bubble plots from meta-regression analyses in which each circle represents an individual study. Bubble size reflects the inverse-variance weight (as a percentage of the maximum weight), colour represents dietary lycopene intake, and grey circles indicate missing moderator data. Black points and vertical bars represent category-specific predicted effects estimated using random-effects meta-regression (REML), with corresponding 95% confidence intervals.

**Supplementary Figure S4.** Meta-regression bubble plot of the association between mean baseline of body mass index and changes in triglycerides levels in the meta-analysis.

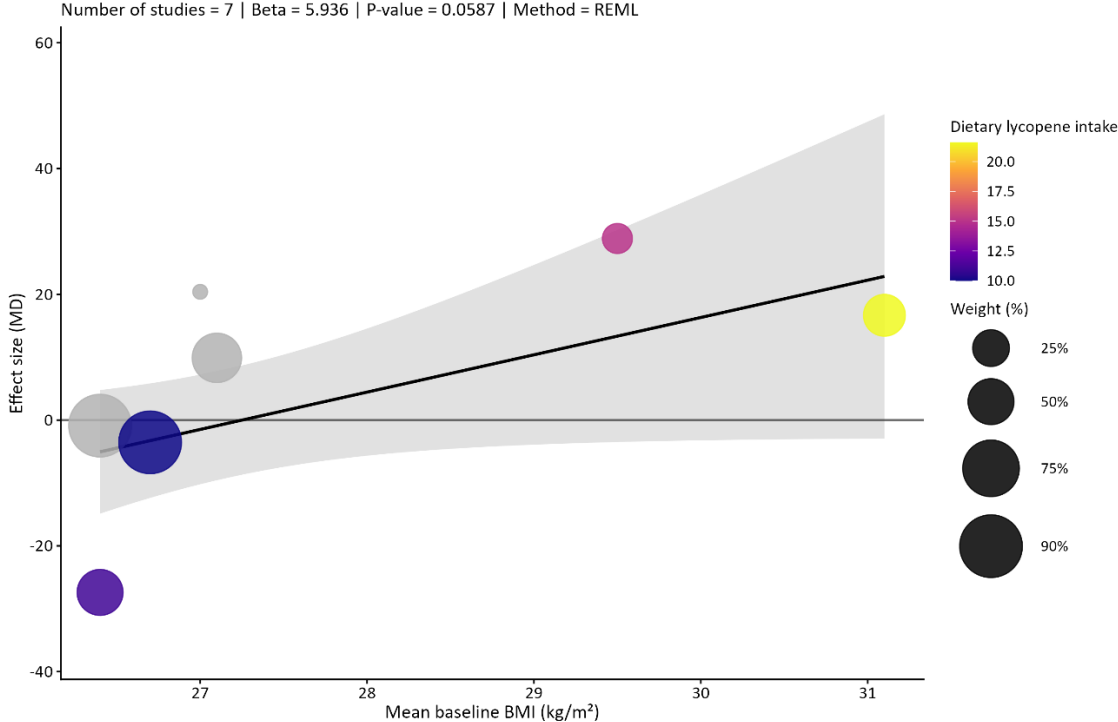

Bubble plots from meta-regression analyses in which each circle represents an individual study. Bubble size reflects the inverse-variance weight (as a percentage of the maximum weight), colour represents dietary lycopene intake, and grey circles indicate missing moderator data. The black line represents the fitted meta-regression estimate obtained using a restricted maximum likelihood (REML) model, with the grey shaded area indicating the 95% confidence interval. **MD**, Mean difference.
